# Supplementary material for: The SERPINA5 coding variant E228Q does not contribute to clinicopathologic characteristics in Alzheimer’s disease: A cross-sectional study
Source: PubMed Central journal article supplement — Medicine (Baltimore). 2023 Jun 16;102(24):e34017. doi: 10.1097/MD.0000000000034017 (PMC10270469; doi:10.1097/md.0000000000034017), 2023-06-16
Supplement: medi-102-e34017-s002.pdf [file medi-102-e34017-s002.pdf]

**Supplementary Table 1:** Primers used to sequence *SERPINA5*

| <b>Oligo name</b>        | <b>Oligo sequence (5' to 3')</b> |
|--------------------------|----------------------------------|
| <i>SERPINA5</i> Exon 1F  | CGGAAACCTGCCAGGAAAG              |
| <i>SERPINA5</i> Exon 1R  | CACCTCTGCTGCCTTGGATAC            |
| <i>SERPINA5</i> Exon 2F  | CTACGGGACACAGTAAGTAC             |
| <i>SERPINA5</i> Exon 2R  | CTGGCCTCTAGATGTCAC               |
| <i>SERPINA5</i> Exon 3AF | AAGCTGAATGGACCAAAC               |
| <i>SERPINA5</i> Exon 3AR | TGGTTGAGTTCCTGAAGG               |
| <i>SERPINA5</i> Exon 3BF | CCTGTGAGCATCTCCATGAG             |
| <i>SERPINA5</i> Exon 3BR | TTATGTATGTGAGGGAATTGGG           |
| <i>SERPINA5</i> Exon 4F  | TGGGTAAAGGAGTCCTTT               |
| <i>SERPINA5</i> Exon 4R  | AGTGGAGTGGAAGTGAATAG             |
| <i>SERPINA5</i> Exon 5F  | CTGGCTATCTTTACTGTCTTC            |
| <i>SERPINA5</i> Exon 5R  | CTTGGATGTCACAGGATG               |
| <i>SERPINA5</i> Exon 6F  | CTCCATGGCTCAGTTGAACAG            |
| <i>SERPINA5</i> Exon 6R  | TGTGGGTGGAAGCAATCATC             |
