# Supplementary material for: The SERPINA5 coding variant E228Q does not contribute to clinicopathologic characteristics in Alzheimer’s disease: A cross-sectional study
Source: PubMed Central journal article supplement — Medicine (Baltimore). 2023 Jun 16;102(24):e34017. doi: 10.1097/MD.0000000000034017 (PMC10270469; doi:10.1097/md.0000000000034017), 2023-06-16

**Supplementary Figure 1:** Histopathologic analysis of a 76-year-old male non-carrier neuropathologically diagnosed with Alzheimer's disease. Case characteristics – Disease duration=17 years, Braak stage=VI, Thal phase=5, and TDP-43 positive. Immunohistochemistry – SERPINA5 and tau (early tangle marker: AT8, advanced tangle marker: 2E9). Scale bar – 50µm.

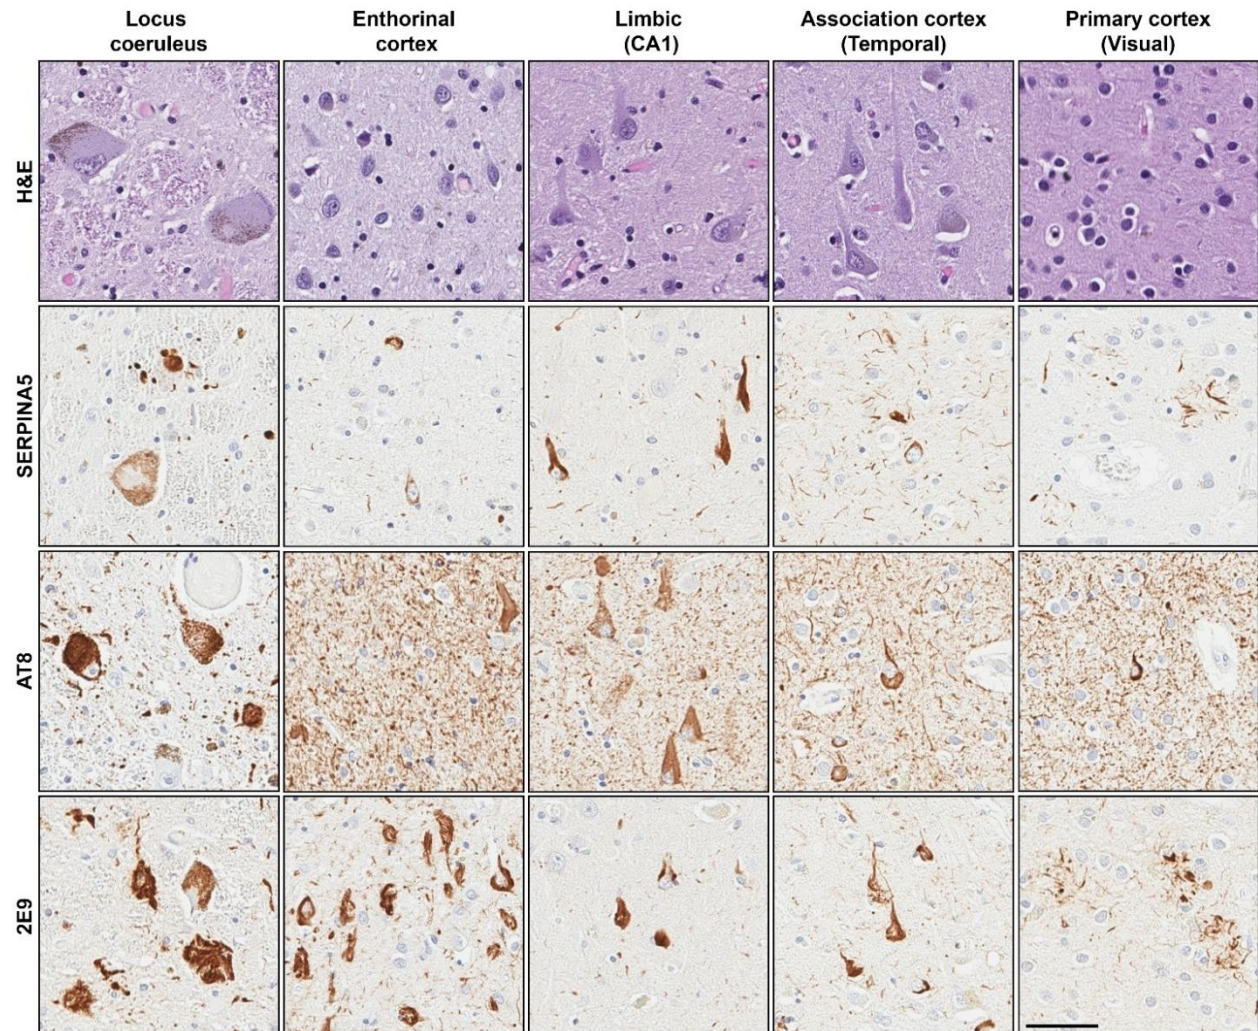

Supplement: medi-102-e34017-s003.pdf [file medi-102-e34017-s003.pdf]
