# Supplementary material for: The SERPINA5 coding variant E228Q does not contribute to clinicopathologic characteristics in Alzheimer’s disease: A cross-sectional study
Source: PubMed Central journal article supplement — Medicine (Baltimore). 2023 Jun 16;102(24):e34017. doi: 10.1097/MD.0000000000034017 (PMC10270469; doi:10.1097/md.0000000000034017), 2023-06-16

**Supplementary Figure 2:** Structural differences between glutamic acid (E) and glutamine (Q).

**Glutamic Acid**

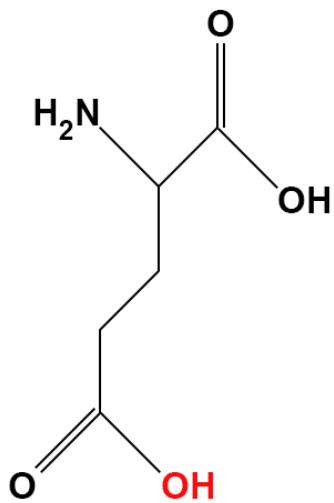

**Glutamine**

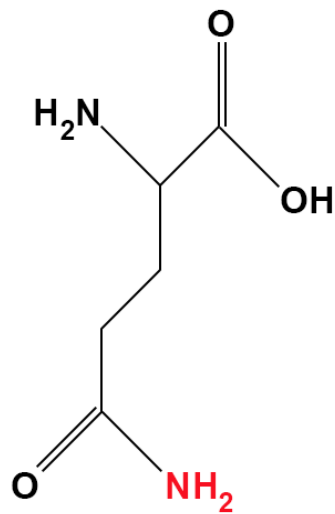

Supplement: medi-102-e34017-s004.pdf [file medi-102-e34017-s004.pdf]
